# Supplementary material for: What Influences Home Gardeners’ Food Waste Composting Intention in High-Rise Buildings in Dhaka Megacity, Bangladesh? An Integrated Model of TPB and DMP
Source: MDPI journal article supplement (doi:10.3390/su14159400), 2022-08-01
Supplement: s1 [file s1]

**Table S1**

Table S1. Application of TPB in waste recycling studies (SLR)

| NO | AUTHOR               | JOURNAL                             | COUNTRY      | RESPONDENT           | SAMPLE SIZE | YEAR | CATEGORY        | IV-DV                                                                         |
|----|----------------------|-------------------------------------|--------------|----------------------|-------------|------|-----------------|-------------------------------------------------------------------------------|
| 1  | Ertz et al.          | Journal of Environmental Management | Canada,China | Student              | 549,672     | 2017 | Plastic waste   | ATT-> INT<br>PBC-> INT<br>SN-> INT<br>INT-> BHV<br>CONTEXT-> MOT<br>MOT-> INT |
| 2  | Ghani et al.         | Waste Management                    | Malaysia     | University staff     | 204         | 2013 | Food waste      | ATT-> INT<br>PBC-> INT<br>SN-> INT<br>INT-> BHV<br>SF-> INT                   |
| 3  | Zhang et al.         | Waste Management                    | China        | Electronic Consumers | 802         | 2020 | E-waste         | ATT-> INT<br>PBC-> INT<br>SN-> INT<br>Past BHV-> INT<br>Conscientiousness>ATT |
| 4  | Onel & Mukherjee     | <i>Psychol.Mark.</i>                | USA          | Students             | 206         | 2017 | Domestic waste  | ATT-> INT<br>PBC-> INT<br>SN-> INT<br>INT-> PRO-BHV<br>Affect-> ATT           |
| 5  | Papaoikonomou et al. | Environmental Processes             | Greece       | Citizens             | 310         | 2020 | E-waste         | ATT-> INT<br>PBC-> INT<br>SN-> INT<br>WTP->PBC<br>MN->PBC                     |
| 6  | Xu et al.2017        | Sustainability                      | China        | Residents            | 628         | 2017 | Household Waste | ATT-> INT<br>PBC-> INT<br>SN-> INT<br>PB-> INT<br>PMO->ATT                    |

| NO | AUTHOR                 | JOURNAL                                                     | COUNTRY   | RESPONDENT            | SAMPLE SIZE | YEAR | CATEGORY        | IV-DV                                                                                                                                                                       |
|----|------------------------|-------------------------------------------------------------|-----------|-----------------------|-------------|------|-----------------|-----------------------------------------------------------------------------------------------------------------------------------------------------------------------------|
| 7  | Mamun et al.,2018      | Sustainability                                              | Malaysia  | low-income households | 380         | 2018 | Domestic waste  | ATT-> INT<br>PBC-> INT<br>SN-> INT<br>INT-> BHV<br>ECO LITERACY->ATT<br>EC-> ATT<br>ECO LITERACY-> ATT<br>Env Concern-> ATT<br>Moral obligation->SN<br>Normative belief->SN |
| 8  | Zhang et al.           | Sustainability                                              | China     | Residents             | 500         | 2020 | Household Waste | PBC-> INT<br>SN-> INT<br>INT-> BHV                                                                                                                                          |
| 9  | Rhodes et al.          | Environment and Behavior                                    | Canada    | Residents             | 176         | 2014 | Household Waste | ATT-> INT<br>PBC-> INT<br>SN-> INT<br>INT-> BHV                                                                                                                             |
| 10 | Poškus, 2015           | PSICHOLOGIJA                                                | Lithuania | Students              | 142         | 2015 | Domestic waste  | MN-> INT<br>PBC-> INT<br>SN-> INT<br>INT-> BHV                                                                                                                              |
| 11 | Passafaro et al., 2019 | Frontiers in Psychology                                     | Italy     | Students              | 222         | 2019 | Household Waste | ATT-> INT<br>PBC-> INT<br>SN-> INT<br>LN->INT                                                                                                                               |
| 12 | PAMUK & PAMUK, 2019    | International Electronic Journal of Environmental Education | Turkey    | Teachers              | 834         | 2019 | Domestic waste  | ATT-> INT<br>PBC-> INT<br>SN-> INT<br>INT-> BHV                                                                                                                             |

| NO | AUTHOR                | JOURNAL                                       | COUNTRY    | RESPONDENT    | SAMPLE SIZE | YEAR | CATEGORY        | IV-DV                                                                                                                                                                        |
|----|-----------------------|-----------------------------------------------|------------|---------------|-------------|------|-----------------|------------------------------------------------------------------------------------------------------------------------------------------------------------------------------|
| 13 | Luzon et al., 2012    | <i>Journal of Applied Social Psychology</i>   | Spain      | Housewives    | 154         | 2012 | Household Waste | ATT-> INT<br>PBC-> INT<br>SN-> INT<br>INT-> BHV                                                                                                                              |
| 14 | Mahmud et al., 2020   | <i>Waste Management &amp; Research</i>        | Bangladesh | Shop Manager  | 127         | 2020 | E-waste         | ATT-> INT<br>SN-> INT<br><b>PN-&gt; INT</b><br><b>PBC-&gt; INT</b><br>Info Publicity-> ATT<br>Info Publicity -> SN<br>Ascription of responsibility->PN<br>Convenience -> PBC |
| 15 | Alhassan et al., 2017 | Management of Environmental Quality           | Ghana      | Households    | 855         | 2018 | Solid waste     | ATT-> INT<br><b>PBC-&gt; INT</b><br>SN-> INT<br>Inconvenience->INT                                                                                                           |
| 16 | Chen & Lee, 2020      | International Trade, Politics and Development | China      | Residents     | 371         | 2020 | Household Waste | Policy regulation-> ATT<br><b>Incentives-&gt; ATT</b><br>Facilitating Condition->ATT<br>SN->ATT<br>ATT->INT<br>MN->ATT<br><b>Self efficacy-&gt;ATT</b><br>AC->ATT            |
| 17 | Wan et al., 2012      | Facilities                                    | Hong Kong  | Student+Staff | 179+26=205  | 2012 | Domestic waste  | ATT-> INT<br>PBC-> INT<br>SN-> INT<br>INT-> BHV<br>MN-> INT<br>AC-> INT<br>CONV-> INT                                                                                        |

|    |                             |                                     |                 |                      |      |      |                                   |                                                                                                                                                                                                                                                  |
|----|-----------------------------|-------------------------------------|-----------------|----------------------|------|------|-----------------------------------|--------------------------------------------------------------------------------------------------------------------------------------------------------------------------------------------------------------------------------------------------|
| 18 | Razali et al., 2020         | Journal of Cleaner Production       | Malaysia        | Residents            | 900  | 2020 | Household Waste                   | ATT-> BHV<br>PBC-> BHV<br>SN-> BHV<br>MN-> BHV                                                                                                                                                                                                   |
| 19 | Jain et al., 2020           | Journal of Cleaner Production       | India           | builders and vendors | 260  | 2020 | Construction and demolition waste | ATT-> INT<br>PBC-> INT<br>SN-> INT<br>INT-> BHV<br>Perceived benefit->ATT<br>Perceived cost->ATT                                                                                                                                                 |
| 20 | Fan et al., 2019            | Journal of Cleaner Production       | China,Singapore | Residents            | 1100 | 2019 | Household Waste                   | SN-> INT<br>INT-> BHV                                                                                                                                                                                                                            |
| 21 | Echegaray & Hansstein, 2017 | Journal of Cleaner Production       | Brazil          | Households           | 806  | 2017 | E-waste                           | ATT-> INT<br>PBC-> INT<br>SN-> INT<br>INT-> BHV<br>Awareness -> INT<br>Environmental -> INT assessment                                                                                                                                           |
| 22 | Liu et al., 2019            | Resources, Conservation & Recycling | China           | Electronic Consumers | 1471 | 2019 | E-waste                           | ATT-> INT<br>PBC-> INT<br>SN-> INT<br>Environmental responsibility-> ATT<br>Environmental sensitivity-> ATT<br>Perceptions of negative effects ->ATT<br>Personal influence->SN<br>Group influence->SN<br>Convenience-> PBC<br>Self-ability-> PBC |

|    |                     |                                     |           |            |     |      |                 |                                                                                                                                    |
|----|---------------------|-------------------------------------|-----------|------------|-----|------|-----------------|------------------------------------------------------------------------------------------------------------------------------------|
| 23 | Nguyen et al., 2015 | Habitat International               | Vietnam   | Households | 180 | 2015 | Household Waste | ATT-> INT<br>PMN-> INT<br>SN-> INT<br>Perceived difficulties-> INT<br>Trust-> INT<br>PERSONAL MORAL NORM                           |
| 24 | Wang et al., 2020   | Waste Management                    | China     | Residents  | 397 | 2020 | Household Waste | ATT-> INT<br>PBC-> INT<br>SN-> INT<br>Incentive measure-> BHV<br>INT-> BHV<br>PN-> INT<br>KNW-> INT                                |
| 25 | Khan et al., 2019   | Resources, Conservation & Recycling | Pakistan  | Households | 243 | 2019 | Plastic Waste   | ATT-> INT<br>PBC-> INT<br>SN-> INT<br>INT-> BHV<br>MN-> INT<br>AC-> INT<br>CONV-> INT                                              |
| 26 | Arli et al., 2019   | Int J Nonprofit Volunt Sect Mark    | Australia | Consumers  | 827 | 2019 | Domestic waste  | ATT-> INT<br>PBC-> INT<br>SN-> INT<br>INT-> BHV<br>MN-> SN<br>Self efficacy-> PBC<br>Situational factors-> PBC<br>Awareness -> ATT |
| 27 | Ma et al., 2018     | Sustainable Cities and Society      | China     | Residents  | 848 | 2018 | Domestic waste  | ATT-> INT<br>PBC-> INT<br>SN-> INT<br>INT-> BHV<br>SF-> INT                                                                        |

|    |                          |                                                 |       |            |     |      |                |                                                                                                                                                                          |
|----|--------------------------|-------------------------------------------------|-------|------------|-----|------|----------------|--------------------------------------------------------------------------------------------------------------------------------------------------------------------------|
| 28 | Liao et al., 2018        | Sustainable Cities and Society                  | China | Residents  | 487 | 2018 | Food waste     | ATT-> INT<br>PBC-> INT<br><b>SN-&gt; INT</b><br>Facilities-> INT<br>Time pressure-> INT<br>Env Concern-> SN                                                              |
| 29 | Heidari et al., 2019     | Environmental Science and Pollution Research    | Iran  | Households | 382 | 2019 | Food waste     | ATT-> PBC<br>PBC-> INT<br>SN-> INT<br>Waste-preventing Behavior<br>Perceived ascription of responsibility-> PBC<br>Marketing/sale Addiction-> PBC<br>Moral attitude->ATT |
| 30 | Heidari et al., 2018     | Journal of Material Cycles and Waste Management | Iran  | Students   | 420 | 2018 | Solid waste    | ATT-> INT<br>PBC-> INT<br><b>SN-&gt; INT</b><br>INT-> BHV<br>Moral obligation-> INT<br>Env awareness-> ATT<br>SF-> INT<br>Motivation-> INT                               |
| 31 | Shen et al.,2020         | Int. J. Environ. Res. Public Health             | China | Households | 327 | 2020 | Domestic waste | ATT-> INT<br>PBC-> INT<br><b>SN-&gt; INT</b><br>PN-> INT                                                                                                                 |
| 32 | <b>Tsai et al., 2020</b> | Foods                                           | china | Students   | 400 | 2020 | Food waste     | ATT-> INT<br>PBC-> INT<br><b>SN-&gt; INT</b><br><b>Env concern-&gt; INT</b>                                                                                              |

|    |                        |                                           |           |                |     |      |                       |                                                                                                                          |
|----|------------------------|-------------------------------------------|-----------|----------------|-----|------|-----------------------|--------------------------------------------------------------------------------------------------------------------------|
| 33 | Koduah et al.,<br>2019 | JOURNAL OF<br>AFRICAN<br>BUSINESS         | Ghana     | Households     | 343 | 2019 | Domestic<br>waste     | ATT-> INT<br>PBC-> INT<br>SN-> INT<br>PBC-> BHV<br>ATT-> BHV<br>SN-> BHV                                                 |
| 34 | Yu et al., 2020        | Int. J. Environ.<br>Res. Public<br>Health | China     | Farmers        | 704 | 2020 | Agricultural<br>Waste | ATT-> INT<br>PBC-> INT<br>SN-> INT                                                                                       |
| 35 | Afroz et al.,2020      | Eco feminism<br>and Climate<br>Change     | Malaysia  | Households     | 600 | 2020 | E-waste               | ATT-> INT<br>Cost of recycling-> INT<br>Convenience-> INT<br>SN-> INT<br>Env Awareness -> INT                            |
| 36 | HAO et al.,2018        | The Singapore<br>Economic<br>Review       | China     | Students       | 536 | 2018 | Domestic<br>waste     | ATT-> INT<br>PBC-> INT<br>SN-> INT<br>INT-> BHV<br>Consequences of Waste<br>Sorting-> INT<br>SF-> BHV                    |
| 37 | Muniandy &<br>Anuar    | Management<br>Science Letters             | Malaysia  | Lecturers      | 101 | 2020 | Domestic<br>waste     | ATT-> BHV<br>PBC-> BHV<br>SN-> BHV<br>Environmental belief-><br>BHV<br>Environmental belief-><br>ATT                     |
| 38 | White & Hyde,<br>2012  | Environment<br>and Behavior               | Australia | General public | 200 | 2012 | Household<br>Waste    | ATT-> INT<br>PBC-> INT<br>SN-> INT<br>INT-> BHV<br>Conscientiousness-> INT<br>Self-identity-> INT<br>Past behavior-> INT |

| NO | AUTHOR                   | JOURNAL                              | COUNTRY | RESPONDENT  | SAMPLE SIZE | YEAR | CATEGORY                          | IV-DV                                                                                                                                                                              |
|----|--------------------------|--------------------------------------|---------|-------------|-------------|------|-----------------------------------|------------------------------------------------------------------------------------------------------------------------------------------------------------------------------------|
| 39 | Wight et al., 2012       | American Journal of Health Education | USA     | Students    | 189         | 2012 | Municipal Solid Waste             | ATT-> INT<br>PBC-> INT<br>SN-> INT<br>Perceived control-> INT<br>Descriptive norm-> INT                                                                                            |
| 40 | Chen&Tung,2010           | Environment and Behavior             | Taiwan  | Residents   | 541         | 2010 | Municipal solid waste             | ATT-> INT<br>PBC-> INT<br>SN-> INT<br>MN-> INT<br>Consequences of Recycling-> INT                                                                                                  |
| 41 | Wu et al.,2017           | Waste Management                     | China   | Contractors | 207         | 2017 | Construction and demolition waste | ATT-> INT<br><b>PBC-&gt; INT</b><br>SN-> INT<br><b>INT-&gt; BHV</b><br><b>Governmental Supervision-&gt; BHV</b><br><b>Project constraints-&gt; BHV</b><br>Economic viability-> BHV |
| 42 | Oztekin et al.,2017      | Waste Management                     | Turkey  | Students    | 863         | 2017 | Domestic waste                    | ATT-> INT<br>PBC-> INT<br>SN-> INT<br>INT-> BHV<br>Past behavior-> INT                                                                                                             |
| 43 | Stoeva & Alriksson, 2017 | Waste Management                     | Sweden  | Students    | 112         | 2017 | Household Waste                   | ATT-> INT<br>PBC-> INT<br><b>SN-&gt; INT</b><br>INT-> BHV<br><b>Satisfaction with local facilities-&gt; INT</b>                                                                    |



|    |                           |                                     |           |            |     |      |                                   |                                                                                                                                                                   |
|----|---------------------------|-------------------------------------|-----------|------------|-----|------|-----------------------------------|-------------------------------------------------------------------------------------------------------------------------------------------------------------------|
| 44 | Chan & Bishop,2013        | Journal of Environmental Psychology | Australia | Students   | 271 | 2013 | Paper waste                       | ATT-> INT<br>PBC-> INT<br>SN-> INT<br>INT-> BHV<br>MN ->ATT<br>PBC-> BHV                                                                                          |
| 45 | Ramayah et al.,2012       | Journal of Environmental Management | Malaysia  | Students   | 200 | 2012 | Municipal solid waste             | ATT-> BHV<br>SN-> BHV<br>Convenience of Available Recycling Infrastructure-> BHV<br>Cost of Recycling-> BHV<br>Environmental Awareness-> ATT                      |
| 46 | Li et al.,2018            | Journal of Cleaner Production       | China     | Contractor | 491 | 2018 | Construction and demolition waste | ATT-> INT<br>PBC-> INT<br>SN-> INT<br>PN-> INT<br>INT-> BHV<br>PBC-> BHV<br>KNW-> ATT                                                                             |
| 47 | Soorani & Ahmadvand, 2019 | Waste Management                    | Iran      | Households | 405 | 2019 | Food waste                        | ATT-> INT<br>PBC-> INT<br>SN-> INT<br>INT-> BHV<br>Feeling of guilt-> INT<br>Feeling of guilt-> BHV                                                               |
| 48 | Srun & Kurisu, 2019       | Sustainability                      | Cambodia  | Residents  | 413 | 2019 | Household Waste                   | ATT-> INT<br>PBC-> INT<br>SN-> INT<br>PN-> INT<br>Past experience-> INT<br>Satisfaction-> INT<br>Concern-> INT<br>Social pressure-> INT<br>Locus of control-> INT |

| NO | AUTHOR                    | JOURNAL                                      | COUNTRY          | RESPONDENT                 | SAMPLE SIZE | YEAR | CATEGORY              | IV-DV                                                                                                                                                                                 |
|----|---------------------------|----------------------------------------------|------------------|----------------------------|-------------|------|-----------------------|---------------------------------------------------------------------------------------------------------------------------------------------------------------------------------------|
| 49 | Fornara et al., 2011      | Group Processes & Intergroup Relations       | Italy            | Residents                  | 452         | 2011 | Household Waste       | ATT-> INT<br>PBC-> INT<br>SN-> -> INT<br>LN-> INT                                                                                                                                     |
| 50 | PIKTURNIENĖ & BÄUMLE,2014 | Journal of Business Economics and Management | <i>Lithuania</i> | Inhabitants                | 304         | 2014 | Household Waste       | ATT-> INT<br>PBC-> INT<br>SN-> INT<br>INT-> BHV                                                                                                                                       |
| 51 | Mak et al.,2018           | Journal of Cleaner Production                | <i>Hong Kong</i> | Food industry stakeholders | 155         | 2018 | Food waste            | ATT-> INT<br>PBC-> INT<br>SN-> INT<br>INT-> BHV<br>Economic incentives-> INT<br>Logistics and management<br>Incentives-> INT<br>Administrative incentive &<br>corporate support-> INT |
| 52 | Zhang et al.,2016         | Resources, Conservation and Recycling        | <i>China</i>     | Students                   | 250         | 2016 | Municipal solid waste | ATT-> INT<br>PBC-> INT<br>SN-> INT<br>NEP -> INT                                                                                                                                      |
| 53 | Liao et al., 2018b        | Int. J. Environ. Res. Public Health          | <i>China</i>     | Residents                  | 538         | 2018 | Municipal solid waste | ATT-> INT<br>PBC-> INT<br>SN-> INT<br>Past experience-> INT<br>Perceived Effect of Inducement Policy (IP) -> INT<br>Building Policy (CBP) -> INT                                      |

| NO | AUTHOR                          | JOURNAL                                   | COUNTRY        | RESPONDENT | SAMPLE SIZE | YEAR | CATEGORY               | IV-DV                                                                                                                      |
|----|---------------------------------|-------------------------------------------|----------------|------------|-------------|------|------------------------|----------------------------------------------------------------------------------------------------------------------------|
| 54 | <b>Khalil et al., 2017</b>      | Recycling                                 | <i>Nigeria</i> | Households | 393         | 2017 | Household solid waste  | ATT-> INT<br>SN-> INT<br>PN-> INT<br>PBC-> INT                                                                             |
| 55 | <b>Halder &amp; Singh, 2018</b> | Recycling                                 | <i>India</i>   | Students   | 272         | 2018 | Municipal solid wastes | ATT-> INT<br>SN-> INT<br>PN-> INT                                                                                          |
| 56 | <b>Tian et al., 2019</b>        | Sustainability                            | <i>china</i>   | Citizens   | 236         | 2019 | Domestic waste         | ATT-> INT<br>SN-> INT<br>PBC-> INT<br>Government publicity-> ATT<br>Government publicity-> SN<br>Government publicity->PBC |
| 57 | Zhang et al.,2020b              | Journal of Cleaner Production             | <i>China</i>   | Citizens   | 507         | 2020 | Textile waste          | ATT-> INT<br>SN-> INT<br>PBC-> INT<br>Perceived Usefulness (PU) -> ATT<br>Perceived Ease of Use (PEOU) -> ATT              |
| 58 | Zhang et al., 2019b             | Technological Forecasting & Social Change | <i>China</i>   | Residents  | 895         | 2019 | E-waste                | ATT-> INT<br>SN-> INT<br>PBC-> INT<br>Habit-> INT                                                                          |

| NO | AUTHOR                    | JOURNAL                             | COUNTRY      | RESPONDENT | SAMPLE SIZE | YEAR | CATEGORY              | IV-DV                                                                                                                                                                                                        |
|----|---------------------------|-------------------------------------|--------------|------------|-------------|------|-----------------------|--------------------------------------------------------------------------------------------------------------------------------------------------------------------------------------------------------------|
| 59 | <b>Wang et al.,2016</b>   | Journal of Cleaner Production       | <i>China</i> | Residents  | 525         | 2016 | E-waste               | ATT-> INT<br>Environmental awareness(EA) -> INT<br>Costs of recycling(CR) -> INT<br>Norms and publicity(NP) -> INT<br>Convenience of recycling(CVR) -> INT<br>Perceptions of informal recycling (PIR) -> INT |
| 60 | <b>Zhang et al.,2019c</b> | Journal of Environmental Management | <i>China</i> | Residents  | 413         | 2019 | Household solid waste | ATT-> INT<br><b>PBC-&gt; INT</b><br><b>SN-&gt; INT</b><br>INT-> BHV<br>Awareness of Consequence-> ATT<br>Ascribed Responsibility ->ATT<br>Government Stimulus-> BHV<br>Facilities accessibility-> BHV        |
| 61 | (Kumar, 2019              | Resources, Conservation & Recycling | India & UK   | Students   | 101-105     | 2019 | E-WASTE               | ATT-> INT<br>PBC-> INT<br>SN-> INT<br>IR-> INT<br><b>CA-&gt; INT</b><br>SD-> INT<br><b>CON-&gt; INT</b>                                                                                                      |

|    |                                      |                                       |                       |                 |      |      |                        |                                                                        |
|----|--------------------------------------|---------------------------------------|-----------------------|-----------------|------|------|------------------------|------------------------------------------------------------------------|
|    |                                      |                                       |                       |                 |      |      |                        |                                                                        |
| 62 | Nguyen_et al.2018                    | Sustainability                        | Vietnam               | Residents       | 520  | 2018 | E-WASTE                | ATT-> B.INT<br>SP-> B.INT<br>L&R-> B.INT<br>CR->B. INT<br>INC ->B. INT |
| 63 | <b>Yushkova&amp;Feng (2017)</b>      | Verlag GmbH                           | <i>China /Germany</i> | Students        | 1013 | 2017 | E-WASTE                | ATT-> INT<br>EA-> INT<br>SN->INT<br>SDV -> INT                         |
| 64 | <b>Nduneseokwu et al.(2017)</b>      | Sustainability                        | <i>Nigeria</i>        | Consumers       | 384  | 2017 | E-WASTE                | ATT-> INT<br>SN-> INT<br>PBC-> INT<br>EK-> INT                         |
| 65 | <b>Wang et al. (2018)</b>            | Resources, Conservation & Recycling   | <i>China</i>          | Residents       | 462  | 2018 | E-WASTE                | ATT-> INT<br>PBC-> INT<br>SN-> INT<br>PN-> INT                         |
| 66 | (Kianpour et al., 2017)              | Sustainability                        | Malaysia              | Consumers       | 800  | 2017 | E-WASTE                | ATT-> INT<br>PBC-> INT<br><b>SN-&gt; INT</b>                           |
| 67 | <b>Borthakur &amp; Govind (2018)</b> | Resources, Conservation and Recycling | <i>India</i>          | <i>Citizens</i> | 190  | 2018 | E-WASTE                | ATT-> BHV<br><b>PBC-&gt; BHV</b><br>SN-> BHV<br>Awareness -> BHV       |
| 68 | <b>Botetzagias et al. (2015)</b>     | Resources, Conservation and Recycling | <i>Greece</i>         | Students        | 293  | 2015 | Municipal solid wastes | ATT-> INT<br>PBC-> INT<br><b>SN-&gt; INT</b><br><b>MN-&gt; INT</b>     |

| NO | AUTHOR                      | JOURNAL                             | COUNTRY             | RESPONDENT      | SAMPLE SIZE | YEAR | CATEGORY               | IV-DV                                                                                                  |
|----|-----------------------------|-------------------------------------|---------------------|-----------------|-------------|------|------------------------|--------------------------------------------------------------------------------------------------------|
| 69 | <b>Corsini et al.(2018)</b> | Waste Management                    | <i>Italy</i>        | <i>Citizens</i> | 375         | 2018 | Municipal solid wastes | ATT-> BHV<br>PBC-> BHV<br>SOCIAL N-> BHV<br>AC->ATT<br>PN>ATT                                          |
| 70 | <b>Strydom (2018)</b>       | Recycling                           | <i>South africa</i> | Citizens        | 2004        | 2018 | Household waste        | ATT-> INT<br>PBC-> INT<br>SN-> INT<br>INT-> BHV<br>PBC-> BHV                                           |
| 71 | <b>Yuan et al. (2016)</b>   | Sustainability                      | China               | <i>Citizens</i> | 362         | 2016 | kitchen waste          | ATT-> BHV<br>PBC-> BHV<br>SN-> BHV<br>MN-> BHV<br>RD-> BHV                                             |
| 72 | Zhang et al.                | Int. J. Environ. Res. Public Health | China               | Residents       | 208         | 2015 | Household waste        | ATT-> INT<br>SN-> INT<br>PBC-> INT<br>INT-> BHV<br>SF-> BHV<br>Env knw-> ATT<br>Moral obligation-> ATT |
| 73 | Wang et al.                 | Resources, Conservation & Recycling | China               | Residents       | 1225        | 2019 | E-waste                | ATT-> INT<br>SN-> INT<br>PBC-> INT<br>EM-> INT Willingness<br>IN->INT<br>ED-> INT                      |

| NO | AUTHOR                             | JOURNAL                                      | COUNTRY         | RESPONDENT | SAMPLE SIZE | YEAR | CATEGORY                 | IV-DV                                                                                           |
|----|------------------------------------|----------------------------------------------|-----------------|------------|-------------|------|--------------------------|-------------------------------------------------------------------------------------------------|
| 74 | Liao & Li, 2019                    | Int. J. Environ. Res. Public Health          | China           | Students   | 562         | 2019 | Municipal solid wastes   | ATT-> INT<br>SN-> INT<br>PBC-> INT<br>EK-> INT<br>INT-> BHV<br>PBC-> BHV<br>Env education-> ATT |
| 75 | Shen et al                         | Int. J. Environ. Res. Public Health          | China           | Citizens   | 524         | 2019 | Municipal solid wastes   | ATT-> INT<br>SN-> INT<br>PBC-> INT<br>EC-> INT<br>PMO-> INT                                     |
| 76 | Vassanadumrongdee & Kittipongvises | Sustainable Environment Research             | <i>Thailand</i> | Residents  | 1076        | 2018 | Municipal solid wastes   | ATT-> INT<br>SN-> INT<br>PBC-> INT<br>WTP-> INT<br>KNW-> INT<br>INT-> BHV                       |
| 77 | Foon et al.,2020                   | Environmental Science and Pollution Research | Malaysia        | Citizens   | 204         | 2020 | Household waste medicine | ATT-> INT<br>SN-> INT<br>PN-> INT<br>PBC-> INT<br>Perceived Busyness-> INT                      |
| 78 | Wan et al. (2017)                  | Journal of Environmental Psychology          | Hong Kong       | Citizens   | 246         | 2017 | Domestic waste           | ATT-> INT<br>SN-> INT<br>PBC-> INT<br>CA-> INT<br>MN-> INT                                      |

| NO | AUTHOR               | JOURNAL                                           | COUNTRY   | RESPONDENT                   | SAMPLE SIZE | YEAR | CATEGORY                          | IV-DV                                                                                   |
|----|----------------------|---------------------------------------------------|-----------|------------------------------|-------------|------|-----------------------------------|-----------------------------------------------------------------------------------------|
| 79 | Lizin et al.         | Resources, Conservation and Recycling             | Belgium   | Households                   | 1638        | 2017 | E-waste                           | ATT-> INT<br>SN-> INT<br>PBC-> INT<br>Past behavior-> INT<br>Consequences-> INT         |
| 80 | Mak et al.           | Waste Management                                  | Hong Kong | Construction related Experts | 191         | 2019 | Construction and demolition waste | INT->BHV<br>ATT->INT<br>SN-> INT<br>PBC-> INT                                           |
| 81 | Ahmad et al.(2014)   | Applied Research Quality Life                     | Pakistan  | Students                     | 216         | 2014 | Domestic waste                    | ATT-> BHV<br>MN-> BHV<br>SN-> BHV<br>PBC-> BHV                                          |
| 82 | Arı & Yılmaz(2016)   | Ecological Economics                              | Turkey    | Housewives                   | 400         | 2016 | Household waste                   | ATT-> INT<br>SN-> INT<br>PBC-> INT<br>INT-> BHV                                         |
| 83 | Kochan et al. (2016) | The International Journal of Logistics Management | USA       | Students                     | 327         | 2016 | E-waste                           | ATT->INT<br>Perceived norm-> INT<br>CA-> INT<br>Perceived convenience->INT<br>INT-> BHV |
| 84 | Ayob et al.(2017)    | Facilities                                        | Malaysia  | Students                     | 89          | 2017 | Municipal Solid waste             | ATT-> INT<br>SN-> INT<br>PBC-> INT                                                      |
| 85 | Rhodes et al.        | Environment and Behavior                          | Canada    | Residents                    | 176         | 2015 | Municipal Solid waste             | ATT-> INT<br>SN-> INT<br>PBC->INT<br>INT-> BHV<br>PLANNING-> BHV<br>PBC-> BHV           |



|    |                      |                          |         |           |     |      |                 |                                                       |
|----|----------------------|--------------------------|---------|-----------|-----|------|-----------------|-------------------------------------------------------|
| 86 | Birgelen et al.,2008 | Environment and Behavior | Germany | Consumers | 176 | 2008 | Packaging waste | ATT-> BHV<br>PBC-> BHV<br>SN-> BHV<br>Awareness-> BHV |
|----|----------------------|--------------------------|---------|-----------|-----|------|-----------------|-------------------------------------------------------|
